# Supplementary material
Source: PubMed Central journal article supplement (PMC2574586)
Supplement: NIHMS48304-supplement-fig_S2.pdf [file NIHMS48304-supplement-fig_S2.pdf]

A. Triglyceride

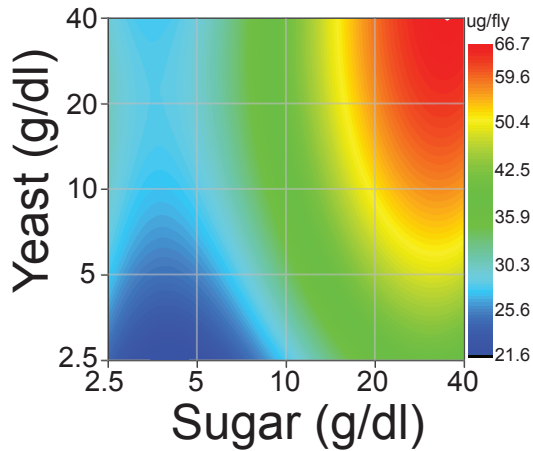

B. Protein

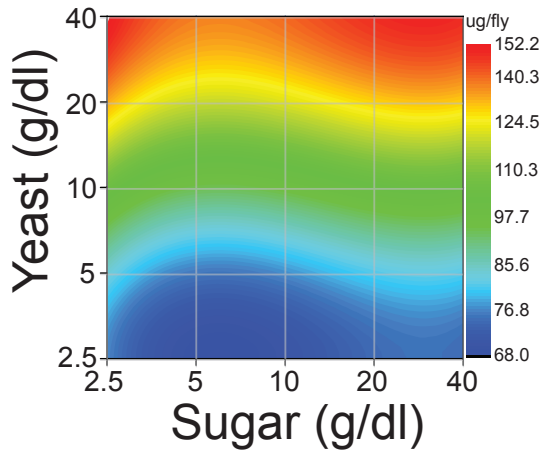

C. TAG/Protein Ratio

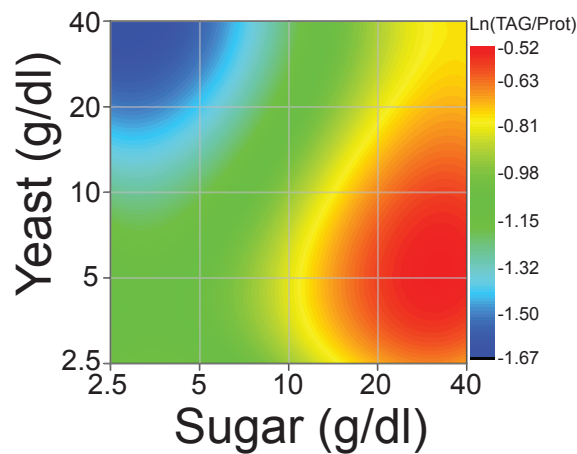

D. Food Consumption

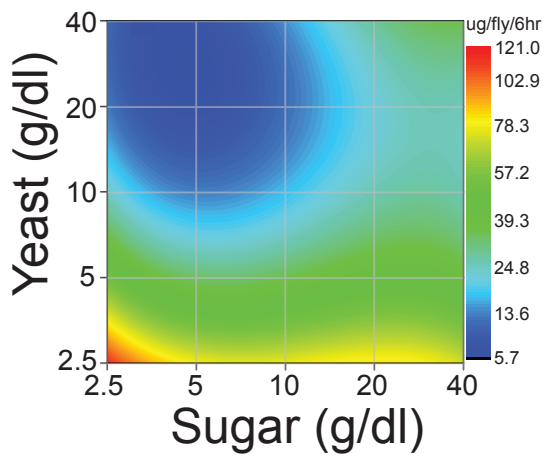

E. Calorie Intake

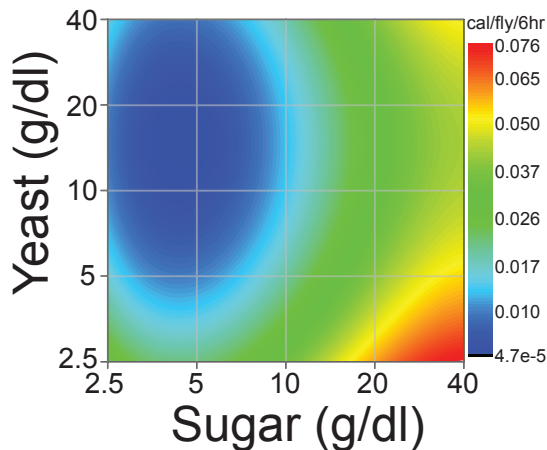

F. Longevity

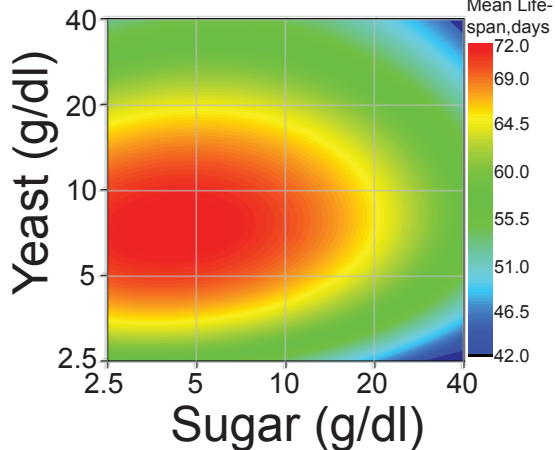

### Canton-S Females Diet Response Surface Plots of Physiology, Behavior, and Lifespan.

Each graph represents surface estimations obtained by combining the 25 nutrient treatments. Measures of whole fly triglyceride (A), protein (B) and scaled triglyceride (C) were obtained by performing colorimetric assays on an aliquot of fly homogenates while food consumption (D) and estimated calorie intake (E) was determined using flies fed dye-labeled food. All experiments were performed twice with similar results obtained. Mean Longevity (F) was calculated based on approximately 150 flies per treatment.
