# Supplementary material
Source: PubMed Central journal article supplement (PMC2574586)
Supplement: NIHMS48304-supplement-fig_S3.pdf [file NIHMS48304-supplement-fig_S3.pdf]

## A. Triglyceride

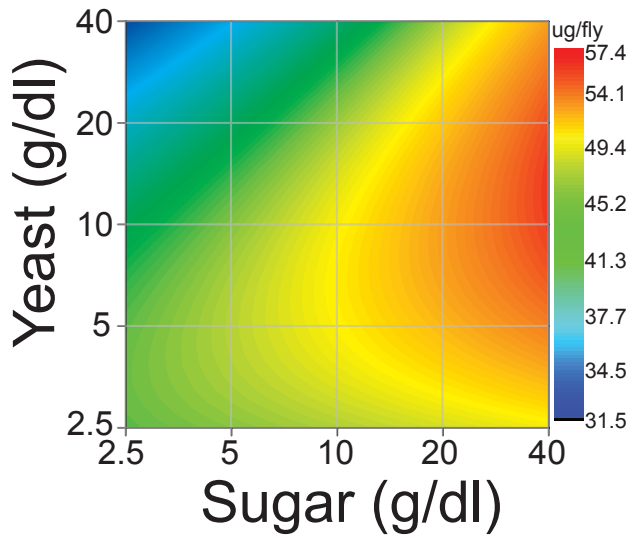

## B. Protein

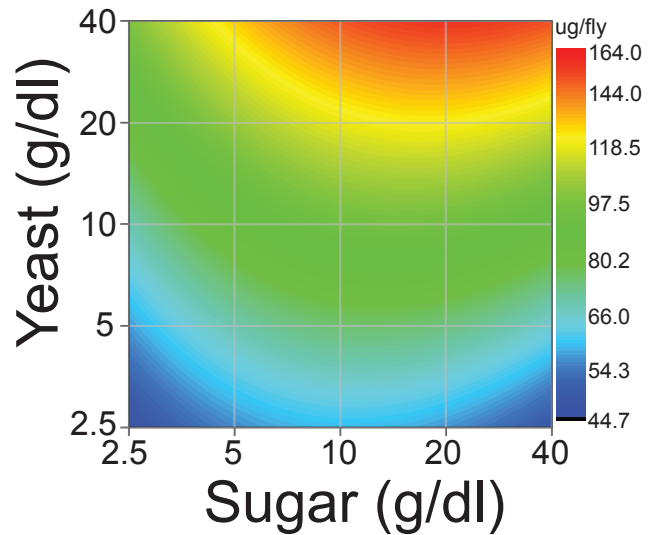

## C. TAG/Protein Ratio

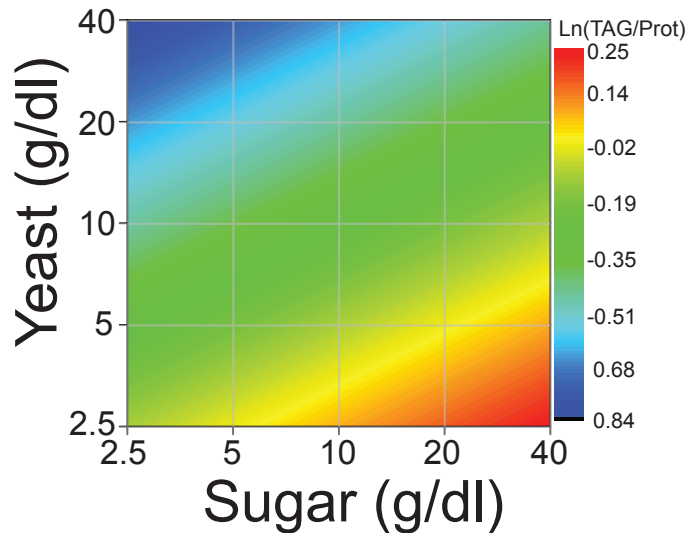

## D. Food Consumption

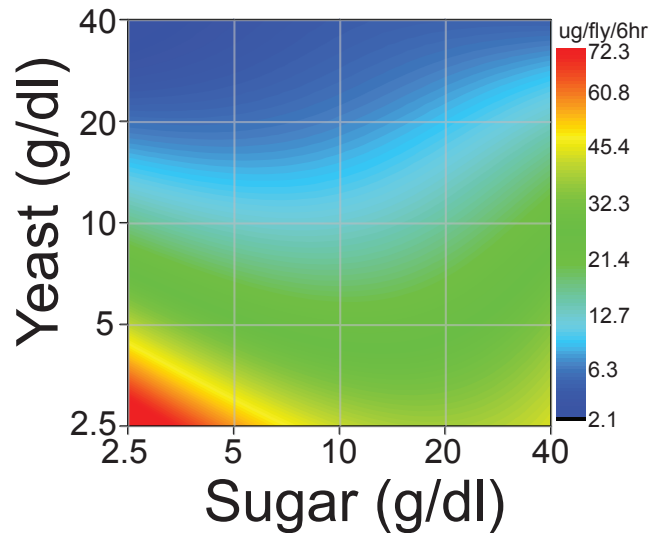

## E. Calorie Intake

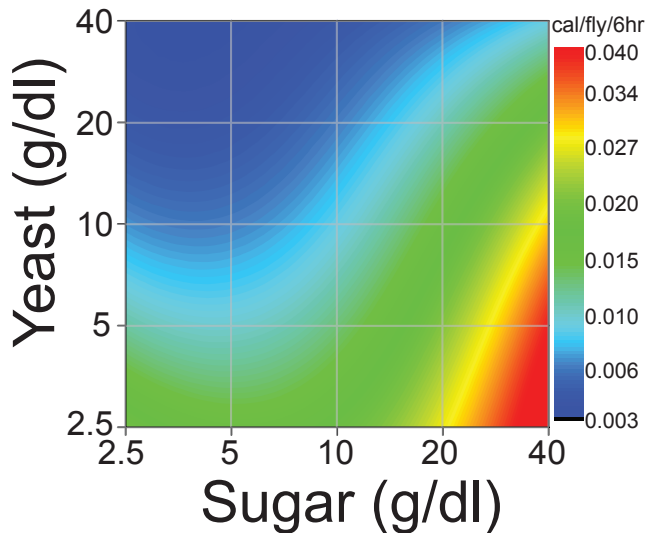

**w1118 Female Diet Response Surface Plots of Physiology & Behavior.** Each graph represents surface estimations obtained by combining the 25 nutrient treatments. Measures of whole fly triglyceride (A), protein (B), and scaled triglyceride (C) were obtained by performing colorimetric assays on aliquots of fly homogenates. Food consumption (D) and estimated caloric intake (E) was determined using flies fed dye-labeled food. All experiments were performed twice with similar results obtained. Raw data and surface estimations are provided in table S7 and S8, respectively.
