# Supplementary material
Source: PubMed Central journal article supplement (PMC2574586)
Supplement: NIHMS48304-supplement-Table_S1.pdf [file NIHMS48304-supplement-Table_S1.pdf]

**Table S1. yw Strain Female Diet Response Surfaces Raw Data**

|                             | Yeast<br>g·dl <sup>-1</sup> | 2.5 g·dl <sup>-1</sup> Sugar |         |     | 5 g·dl <sup>-1</sup> Sugar |         |     | 10 g·dl <sup>-1</sup> Sugar |         |     | 20 g·dl <sup>-1</sup> Sugar |         |     | 40 g·dl <sup>-1</sup> Sugar |         |     |
|-----------------------------|-----------------------------|------------------------------|---------|-----|----------------------------|---------|-----|-----------------------------|---------|-----|-----------------------------|---------|-----|-----------------------------|---------|-----|
|                             |                             | mean                         | s.e.    | n   | mean                       | s.e.    | n   | mean                        | s.e.    | n   | mean                        | s.e.    | n   | mean                        | s.e.    | n   |
| TAG/fly<br>( $\mu$ g)       | 40                          | 8.0                          | 0.82    | 13  | 12.8                       | 1.25    | 16  | 14.7                        | 1.49    | 13  | 19.1                        | 1.01    | 14  | 28.9                        | 2.37    | 8   |
|                             | 20                          | 11.2                         | 0.89    | 16  | 13.2                       | 1.11    | 17  | 17.1                        | 1.97    | 15  | 33.5                        | 2.28    | 13  | 46.9                        | 2.28    | 16  |
|                             | 10                          | 12.4                         | 1.12    | 14  | 15.7                       | 1.37    | 16  | 29.6                        | 1.63    | 15  | 53.9                        | 2.72    | 15  | 64.5                        | 3.92    | 10  |
|                             | 5                           | 15.6                         | 1.41    | 16  | 19.0                       | 1.84    | 16  | 30.9                        | 1.38    | 16  | 47.0                        | 2.30    | 12  | 62.5                        | 4.63    | 10  |
|                             | 2.5                         | 19.4                         | 1.41    | 15  | 25.0                       | 1.36    | 16  | 37.8                        | 2.01    | 16  | 39.6                        | 2.15    | 16  | 44.9                        | 4.58    | 10  |
| Prot./fly<br>( $\mu$ g)     | 40                          | 93.1                         | 3.64    | 13  | 95.1                       | 2.57    | 16  | 94.9                        | 1.86    | 13  | 96.2                        | 2.00    | 14  | 100.0                       | 1.19    | 8   |
|                             | 20                          | 91.0                         | 0.82    | 16  | 87.2                       | 2.29    | 17  | 80.8                        | 2.05    | 15  | 82.1                        | 1.88    | 13  | 87.5                        | 1.40    | 16  |
|                             | 10                          | 94.8                         | 3.50    | 14  | 73.5                       | 2.26    | 16  | 63.6                        | 1.62    | 15  | 71.2                        | 1.84    | 15  | 65.9                        | 1.91    | 10  |
|                             | 5                           | 84.9                         | 2.42    | 16  | 60.2                       | 1.91    | 16  | 49.8                        | 1.39    | 16  | 50.2                        | 1.35    | 12  | 56.9                        | 2.47    | 10  |
|                             | 2.5                         | 75.5                         | 1.58    | 15  | 54.6                       | 2.21    | 16  | 52.1                        | 1.61    | 16  | 48.2                        | 1.58    | 16  | 55.8                        | 4.87    | 10  |
| (TAG/<br>Prot.)             | 40                          | 0.09                         | 0.01    | 13  | 0.13                       | 0.01    | 16  | 0.70                        | 0.02    | 13  | 0.20                        | 0.01    | 14  | 0.29                        | 0.02    | 8   |
|                             | 20                          | 0.12                         | 0.01    | 16  | 0.15                       | 0.01    | 17  | 1.15                        | 0.02    | 15  | 0.41                        | 0.03    | 13  | 0.54                        | 0.03    | 16  |
|                             | 10                          | 0.13                         | 0.01    | 14  | 0.22                       | 0.02    | 16  | 1.95                        | 0.03    | 15  | 0.77                        | 0.05    | 15  | 0.98                        | 0.05    | 10  |
|                             | 5                           | 0.18                         | 0.02    | 16  | 0.32                       | 0.03    | 16  | 2.31                        | 0.03    | 16  | 0.94                        | 0.03    | 12  | 1.11                        | 0.08    | 10  |
|                             | 2.5                         | 0.26                         | 0.02    | 15  | 0.48                       | 0.05    | 16  | 2.45                        | 0.03    | 16  | 0.83                        | 0.04    | 16  | 0.87                        | 0.10    | 10  |
| Lifespan<br>(days)          | 40                          | 43.0                         | 0.90    | 233 | 48.4                       | 1.00    | 229 | 42.2                        | 0.80    | 203 | 43.4                        | 0.80    | 208 | 35.9                        | 0.70    | 239 |
|                             | 20                          | 50.1                         | 1.00    | 228 | 49.1                       | 0.90    | 250 | 53.3                        | 0.90    | 249 | 55.7                        | 1.00    | 266 | 44.3                        | 0.90    | 259 |
|                             | 10                          | 51.0                         | 0.90    | 272 | 52.6                       | 0.90    | 259 | 54.7                        | 0.90    | 261 | 54.7                        | 0.90    | 271 | 43.8                        | 0.90    | 263 |
|                             | 5                           | 51.8                         | 0.90    | 264 | 54.3                       | 0.90    | 250 | 55.4                        | 0.80    | 248 | 55.4                        | 0.80    | 261 | 40.9                        | 0.80    | 267 |
|                             | 2.5                         | 51.7                         | 0.90    | 259 | 50.3                       | 0.90    | 266 | 49.9                        | 0.90    | 266 | 49.9                        | 0.80    | 269 | 36.1                        | 0.80    | 271 |
| #Eggs/fly                   | 40                          | 324.2                        | 2.02    | 4   | 364.3                      | 1.85    | 4   | 287.5                       | 1.63    | 4   | 222.4                       | 1.37    | 4   | 80.2                        | 0.98    | 4   |
|                             | 20                          | 136.4                        | 0.70    | 4   | 123.3                      | 0.58    | 4   | 88.6                        | 0.85    | 4   | 59.1                        | 0.56    | 4   | 101.6                       | 0.79    | 4   |
|                             | 10                          | 50.0                         | 0.38    | 4   | 27.6                       | 0.51    | 4   | 25.7                        | 0.31    | 4   | 38.0                        | 0.67    | 4   | 48.1                        | 0.75    | 4   |
|                             | 5                           | 25.9                         | 0.40    | 4   | 32.4                       | 0.60    | 4   | 31.9                        | 0.63    | 4   | 36.9                        | 0.78    | 4   | 44.2                        | 0.84    | 4   |
|                             | 2.5                         | 34.2                         | 0.60    | 4   | 36.5                       | 0.88    | 4   | 25.2                        | 0.64    | 4   | 33.1                        | 0.80    | 4   | 39.3                        | 0.89    | 4   |
| Food/fly<br>/6hr ( $\mu$ g) | 40                          | 22.7                         | 3.94    | 13  | 20.2                       | 5.53    | 16  | 39.5                        | 2.21    | 13  | 41.4                        | 2.14    | 14  | 41.1                        | 5.88    | 8   |
|                             | 20                          | 19.6                         | 2.28    | 16  | 28.0                       | 4.55    | 17  | 49.4                        | 2.01    | 15  | 55.2                        | 2.07    | 13  | 40.8                        | 2.66    | 16  |
|                             | 10                          | 27.1                         | 1.91    | 14  | 20.3                       | 1.79    | 16  | 67.9                        | 5.16    | 15  | 40.6                        | 1.58    | 15  | 56.8                        | 3.00    | 10  |
|                             | 5                           | 32.1                         | 2.14    | 16  | 39.4                       | 3.17    | 16  | 46.1                        | 2.09    | 16  | 53.2                        | 3.03    | 12  | 65.8                        | 2.32    | 10  |
|                             | 2.5                         | 71.3                         | 3.45    | 15  | 59.2                       | 2.57    | 16  | 62.8                        | 1.31    | 16  | 68.9                        | 2.23    | 16  | 73.9                        | 3.35    | 10  |
| calories/<br>fly/6hr        | 40                          | 2.7E-02                      | 4.1E-03 | 13  | 2.5E-02                    | 3.2E-03 | 16  | 5.3E-02                     | 1.8E-03 | 13  | 6.2E-02                     | 3.4E-03 | 14  | 7.3E-02                     | 6.0E-03 | 8   |
|                             | 20                          | 1.4E-02                      | 1.6E-03 | 16  | 2.2E-02                    | 2.5E-03 | 17  | 4.6E-02                     | 1.9E-03 | 15  | 6.3E-02                     | 3.5E-03 | 13  | 6.1E-02                     | 3.5E-03 | 16  |
|                             | 10                          | 1.2E-02                      | 8.5E-04 | 14  | 1.1E-02                    | 9.4E-04 | 16  | 4.5E-02                     | 3.4E-03 | 15  | 3.8E-02                     | 1.5E-03 | 15  | 7.6E-02                     | 4.0E-03 | 10  |
|                             | 5                           | 9.0E-03                      | 6.4E-04 | 16  | 1.4E-02                    | 1.7E-03 | 16  | 2.4E-02                     | 1.0E-03 | 16  | 4.3E-02                     | 1.7E-03 | 12  | 8.2E-02                     | 3.3E-03 | 10  |
|                             | 2.5                         | 1.4E-02                      | 7.5E-04 | 15  | 1.7E-02                    | 1.5E-03 | 16  | 2.8E-02                     | 9.8E-04 | 16  | 5.1E-02                     | 1.6E-03 | 16  | 8.8E-02                     | 7.0E-03 | 10  |

Summary of mean and standard error values obtained during 25 nutritional treatments of adult female, yw strain flies. Triglycerides (TAG) per fly, protein (Prot.) per fly, scaled triglycerides (TAG/Prot.), fecundity and food consumption data are representative of at least 2 independent trials. n represents the number of replicates per treatment, each replicate containing 5 flies (TAG, Prot., Food), 20 flies (Eggs), or 1 animal (Lifespan).
