# Supplementary material
Source: PubMed Central journal article supplement (PMC2574586)
Supplement: NIHMS48304-supplement-Table_S2.pdf [file NIHMS48304-supplement-Table_S2.pdf]

**Table S2. Yw Strain Females Diet Response Surface Analyses**

| Response                                 | Coefficient                            | Df  | Estimate | Mean Square | F       | P         |
|------------------------------------------|----------------------------------------|-----|----------|-------------|---------|-----------|
| log<br>( $\mu\text{gTAG}/\text{fly}$ )   | (Intercept)                            |     | 2.38     |             |         |           |
|                                          | Sugar                                  | 1   | 0.41     | 82.19       | 698.35  | <0.0001   |
|                                          | Yeast                                  | 1   | 0.12     | 25.13       | 213.55  | <0.0001   |
|                                          | Yeast <sup>2</sup>                     | 1   | -0.11    | 2.60        | 22.09   | <0.0001   |
|                                          | Sugar-Yeast                            | 1   | 0.04     | 0.53        | 4.52    | 0.036     |
|                                          | Residuals                              | 349 |          | 0.12        |         |           |
| log<br>( $\mu\text{gProt.}/\text{fly}$ ) | (Intercept)                            |     | 5.11     |             |         |           |
|                                          | Sugar                                  | 1   | -0.63    | 1.78        | 102.39  | <0.0001   |
|                                          | Yeast                                  | 1   | -0.66    | 14.35       | 824.99  | <0.0001   |
|                                          | Sugar <sup>2</sup>                     | 1   | 0.09     | 1.92        | 110.19  | <0.0001   |
|                                          | Yeast <sup>2</sup>                     | 1   | 0.34     | 0.01        | 0.76    | 0.393     |
|                                          | Yeast <sup>3</sup>                     | 1   | -0.05    | 0.27        | 15.71   | 0.0002    |
|                                          | Sugar-Yeast                            | 1   | 0.06     | 1.08        | 62.06   | <0.0001   |
| Residuals                                | 347                                    |     | 0.02     |             |         |           |
| log<br>(TAG/Prot.)                       | (Intercept)                            |     | -2.20    |             |         |           |
|                                          | Sugar                                  | 1   | 0.97     | 108.18      | 794.19  | <0.0001   |
|                                          | Yeast                                  | 1   | 0.04     | 77.48       | 568.80  | <0.0001   |
|                                          | Sugar <sup>2</sup>                     | 1   | -0.08    | 1.40        | 10.25   | 0.0007    |
|                                          | Yeast <sup>2</sup>                     | 1   | -0.12    | 2.97        | 21.78   | <0.0001   |
| Residuals                                | 349                                    |     | 0.14     |             |         |           |
| $\sqrt{}$ (Eggs/fly)                     | (Intercept)                            |     | 9.26     |             |         |           |
|                                          | Cohort                                 | 1   | 0.04     | 0.04        | 0.11    | 0.7388    |
|                                          | Sugar                                  | 1   | -3.34    | 11.98       | 31.89   | 1.805E-07 |
|                                          | Yeast                                  | 1   | -6.27    | 280.18      | 745.84  | < 2.2E-16 |
|                                          | Sugar <sup>2</sup>                     | 1   | 0.56     | 0.01        | 0.02    | 0.8769    |
|                                          | Yeast <sup>2</sup>                     | 1   | 1.64     | 77.51       | 206.33  | < 2.2E-16 |
|                                          | Sugar-Yeast                            | 1   | 1.27     | 31.65       | 84.26   | 1.217E-14 |
|                                          | Sugar <sup>2</sup> -Yeast <sup>2</sup> | 1   | -0.09    | 20.59       | 54.81   | 6.156E-11 |
| Residuals                                | 92                                     |     | 0.38     |             |         |           |
| Age at Death<br>(days)                   | (Intercept)                            |     | 31.38    |             |         |           |
|                                          | Sugar                                  | 1   | 9.68     | NA          | NA      | <0.0001   |
|                                          | Yeast                                  | 1   | 14.91    | NA          | NA      | <0.0001   |
|                                          | Sugar <sup>2</sup>                     | 1   | -3.47    | NA          | NA      | <0.0001   |
|                                          | Yeast <sup>2</sup>                     | 1   | -4.64    | NA          | NA      | <0.0001   |
|                                          | Sugar-Yeast                            | 1   | 1.80     | NA          | NA      | <0.0001   |
| $\sqrt{}$ (food/fly/6h)                  | (Intercept)                            |     | 18.30    |             |         |           |
|                                          | Sugar                                  | 1   | -7.35    | 174.52      | 165.40  | <0.0001   |
|                                          | Yeast                                  | 1   | -9.50    | 245.39      | 232.60  | <0.0001   |
|                                          | Sugar <sup>2</sup>                     | 1   | 2.95     | 7.35        | 6.97    | 0.0090    |
|                                          | Yeast <sup>2</sup>                     | 1   | 2.60     | 22.13       | 20.98   | <0.0001   |
|                                          | Sugar <sup>3</sup>                     | 1   | -0.40    | 21.16       | 20.06   | <0.0001   |
|                                          | Yeast <sup>3</sup>                     | 1   | -0.29    | 8.90        | 8.44    | 0.0040    |
|                                          | Sugar-Yeast                            | 1   | 1.42     | 16.07       | 15.23   | <0.0001   |
|                                          | Sugar <sup>2</sup> -Yeast <sup>2</sup> | 1   | -0.06    | 27.08       | 25.67   | <0.0001   |
| Residuals                                | 345                                    |     | 1.05     |             |         |           |
| log<br>(calories/fly/6h)                 | (Intercept)                            |     | 0.250    |             |         |           |
|                                          | Sugar                                  | 1   | -0.165   | 1.052       | 1263.00 | <0.0001   |
|                                          | Yeast                                  | 1   | -0.090   | 0.047       | 9.20    | <0.0001   |
|                                          | Sugar <sup>2</sup>                     | 1   | 0.085    | 0.008       | 12.40   | 0.0110    |
|                                          | Yeast <sup>2</sup>                     | 1   | 0.020    | 0.030       | 55.90   | <0.0001   |
|                                          | Sugar <sup>3</sup>                     | 1   | -0.010   | 0.011       | 35.90   | <0.0001   |
|                                          | Sugar-Yeast                            | 1   | 0.025    | 0.013       | 16.10   | 0.0002    |
|                                          | Sugar <sup>2</sup> -Yeast <sup>2</sup> | 1   | -0.002   | 0.017       | 20.20   | <0.0001   |
| Residuals                                | 346                                    |     | 0.008    |             |         |           |

Statistical analysis and best fit model for Diet Response Surface estimation (see Experimental procedures for details) presented in Figure 1A (log  $\mu\text{gTAG}/\text{fly}$ ), 1B (log  $\mu\text{gProt.}/\text{fly}$ ) 1C (logTAG/Prot), 2A ( $\sqrt{\text{eggs}/\text{fly}}$ ), 2B (Age at Death, days), 3A ( $\sqrt{\text{food}/\text{fly}/\text{day}}$ ) and 3B(log(calories/fly/day)). With the exception of age at death estimated regression coefficient are from a multiple regression analysis, while degrees of freedom (Df), sums of squares, and F values are obtained by ANOVA. P values are obtained by randomization. For age at death, a mixed-effects linear model was fit using replicate vial cohorts as a random effect.
