# Supplementary material
Source: PubMed Central journal article supplement (PMC2574586)
Supplement: NIHMS48304-supplement-Table_S3.pdf [file NIHMS48304-supplement-Table_S3.pdf]

**Table S3. Yw Strain Male Diet Response Surfaces Raw Data**

|                       | Yeast<br>g·dl <sup>-1</sup> | 2.5 g·dl <sup>-1</sup> Sugar |         |    | 5 g·dl <sup>-1</sup> Sugar |         |    | 10 g·dl <sup>-1</sup> Sugar |         |    | 20 g·dl <sup>-1</sup> Sugar |         |    | 40 g·dl <sup>-1</sup> Sugar |         |    |
|-----------------------|-----------------------------|------------------------------|---------|----|----------------------------|---------|----|-----------------------------|---------|----|-----------------------------|---------|----|-----------------------------|---------|----|
|                       |                             | mean                         | s.e.    | n  | mean                       | s.e.    | n  | mean                        | s.e.    | n  | mean                        | s.e.    | n  | mean                        | s.e.    | n  |
| TAG/fly<br>(µg)       | 40                          | 1.2                          | 0.34    | 10 | 2.0                        | 0.20    | 8  | 5.2                         | 0.54    | 10 | 15.8                        | 2.72    | 10 | 14.8                        | 1.11    | 5  |
|                       | 20                          | 3.3                          | 0.29    | 10 | 1.9                        | 0.16    | 10 | 8.1                         | 1.40    | 10 | 8.4                         | 0.31    | 11 | 12.6                        | 0.69    | 10 |
|                       | 10                          | 4.3                          | 0.37    | 10 | 3.5                        | 0.24    | 10 | 7.2                         | 0.36    | 11 | 10.6                        | 0.43    | 10 | 15.2                        | 0.70    | 10 |
|                       | 5                           | 5.2                          | 0.60    | 9  | 3.8                        | 0.24    | 10 | 8.1                         | 0.38    | 10 | 11.1                        | 0.39    | 10 | 16.0                        | 0.86    | 10 |
|                       | 2.5                         | 4.8                          | 0.47    | 10 | 4.8                        | 0.50    | 11 | 7.6                         | 0.41    | 12 | 13.6                        | 0.53    | 10 | 16.1                        | 0.96    | 10 |
| Prot./fly<br>(µg)     | 40                          | 50.3                         | 2.04    | 10 | 50.0                       | 1.91    | 8  | 52.3                        | 1.41    | 10 | 53.7                        | 1.17    | 10 | 45.9                        | 2.14    | 5  |
|                       | 20                          | 55.4                         | 0.78    | 10 | 52.5                       | 0.83    | 10 | 46.5                        | 1.13    | 10 | 51.1                        | 1.25    | 11 | 49.0                        | 0.81    | 10 |
|                       | 10                          | 51.8                         | 2.86    | 10 | 49.1                       | 1.51    | 10 | 45.9                        | 0.67    | 11 | 48.5                        | 1.34    | 10 | 45.7                        | 0.80    | 10 |
|                       | 5                           | 58.5                         | 2.96    | 9  | 44.2                       | 1.39    | 10 | 43.0                        | 1.79    | 10 | 39.9                        | 0.98    | 10 | 41.1                        | 0.75    | 10 |
|                       | 2.5                         | 55.4                         | 1.27    | 10 | 41.6                       | 1.41    | 11 | 42.7                        | 2.03    | 12 | 36.0                        | 1.10    | 10 | 40.3                        | 1.90    | 10 |
| (TAG/<br>Prot.)       | 40                          | 0.03                         | 0.01    | 10 | 0.04                       | 0.00    | 8  | 0.10                        | 0.01    | 10 | 0.30                        | 0.06    | 10 | 0.32                        | 0.01    | 5  |
|                       | 20                          | 0.06                         | 0.01    | 10 | 0.04                       | 0.00    | 10 | 0.18                        | 0.03    | 10 | 0.16                        | 0.01    | 11 | 0.26                        | 0.01    | 10 |
|                       | 10                          | 0.08                         | 0.01    | 10 | 0.07                       | 0.01    | 10 | 0.16                        | 0.01    | 11 | 0.22                        | 0.01    | 10 | 0.33                        | 0.01    | 10 |
|                       | 5                           | 0.09                         | 0.01    | 9  | 0.09                       | 0.01    | 10 | 0.19                        | 0.01    | 10 | 0.28                        | 0.01    | 10 | 0.39                        | 0.02    | 10 |
|                       | 2.5                         | 0.09                         | 0.01    | 10 | 0.12                       | 0.02    | 11 | 0.18                        | 0.01    | 12 | 0.38                        | 0.02    | 10 | 0.41                        | 0.03    | 10 |
| Food/fly<br>/6hr (µg) | 40                          | 7.0                          | 1.2     | 10 | 2.5                        | 0.8     | 5  | 18.0                        | 1.4     | 10 | 18.9                        | 1.0     | 10 | 22.4                        | 0.8     | 5  |
|                       | 20                          | 4.2                          | 0.8     | 10 | 3.7                        | 1.0     | 8  | 17.0                        | 2.0     | 10 | 15.1                        | 1.6     | 11 | 19.3                        | 0.8     | 10 |
|                       | 10                          | 5.5                          | 0.6     | 10 | 4.6                        | 1.2     | 10 | 18.1                        | 0.6     | 11 | 17.7                        | 0.7     | 10 | 26.7                        | 0.7     | 10 |
|                       | 5                           | 9.3                          | 0.4     | 9  | 9.6                        | 1.1     | 10 | 23.9                        | 0.7     | 10 | 26.5                        | 1.1     | 10 | 35.1                        | 1.5     | 10 |
|                       | 2.5                         | 26.1                         | 1.9     | 10 | 39.8                       | 2.5     | 11 | 29.6                        | 3.2     | 12 | 36.9                        | 1.8     | 10 | 49.7                        | 3.7     | 10 |
| calories/<br>fly/6hr  | 40                          | 8.4E-03                      | 1.4E-03 | 10 | 3.1E-03                    | 9.4E-04 | 5  | 2.4E-02                     | 1.8E-03 | 10 | 2.8E-02                     | 1.5E-03 | 10 | 4.0E-02                     | 1.5E-03 | 5  |
|                       | 20                          | 3.1E-03                      | 5.8E-04 | 10 | 3.0E-03                    | 8.3E-04 | 8  | 1.6E-02                     | 1.8E-03 | 10 | 1.7E-02                     | 1.8E-03 | 11 | 2.9E-02                     | 1.2E-03 | 10 |
|                       | 10                          | 2.4E-03                      | 2.7E-04 | 10 | 2.4E-03                    | 6.1E-04 | 10 | 1.2E-02                     | 4.2E-04 | 11 | 1.6E-02                     | 6.2E-04 | 10 | 3.6E-02                     | 8.9E-04 | 10 |
|                       | 5                           | 2.6E-03                      | 1.2E-04 | 9  | 3.5E-03                    | 4.0E-04 | 10 | 1.2E-02                     | 3.9E-04 | 10 | 2.1E-02                     | 8.9E-04 | 10 | 4.4E-02                     | 1.8E-03 | 10 |
|                       | 2.5                         | 5.0E-03                      | 3.7E-04 | 10 | 1.1E-02                    | 7.1E-04 | 11 | 1.3E-02                     | 1.4E-03 | 12 | 2.7E-02                     | 1.3E-03 | 10 | 5.9E-02                     | 4.4E-03 | 10 |

Summary of mean and standard error values obtained during 25 nutritional treatments of adult male, yw strain flies. Triglycerides (TAG) per fly, protein (Prot.) per fly, scaled triglycerides (TAG/Prot.), and food consumption data are representative of at least 2 independent trials. n represents the number of replicates per treatment, each replicate containing 8 flies.
