# Supplementary material
Source: PubMed Central journal article supplement (PMC2574586)
Supplement: NIHMS48304-supplement-Table_S4.pdf [file NIHMS48304-supplement-Table_S4.pdf]

**Table S4. Yw Strain Males Diet Response Surfaces: ANOVA and Regression Analysis**

| Response                                 | Coefficient                            | Df   | Estimate | Mean Square | F       | P       |
|------------------------------------------|----------------------------------------|------|----------|-------------|---------|---------|
| log<br>( $\mu\text{gTAG}/\text{fly}$ )   | (Intercept)                            |      | 3.80     |             |         |         |
|                                          | Sugar                                  | 1    | -3.46    | 89.80       | 516.10  | <0.0001 |
|                                          | Yeast                                  | 1    | -0.28    | 10.45       | 60.01   | <0.0001 |
|                                          | Sugar <sup>2</sup>                     | 1    | 1.75     | 0.03        | 0.19    | 0.6800  |
|                                          | Yeast <sup>2</sup>                     | 1    | -0.06    | 0.94        | 5.39    | 0.0205  |
|                                          | Sugar <sup>3</sup>                     | 1    | -0.25    | 3.82        | 21.90   | 0.0002  |
|                                          | Sugar·Yeast                            | 1    | 0.16     | 6.74        | 38.73   | <0.0001 |
| Residuals                                |                                        | 234  |          | 0.17        |         |         |
| log<br>( $\mu\text{gProt.}/\text{fly}$ ) | (Intercept)                            |      | 4.52     |             |         |         |
|                                          | Sugar                                  | 1    | -0.57    | 0.88        | 68.84   | <0.0001 |
|                                          | Yeast                                  | 1    | -0.20    | 1.13        | 88.56   | <0.0001 |
|                                          | Sugar <sup>2</sup>                     | 1    | 0.07     | 0.19        | 15.13   | 0.0004  |
|                                          | Yeast <sup>2</sup>                     | 1    | 0.02     | 0.05        | 3.72    | 0.07220 |
|                                          | Sugar·Yeast                            | 1    | 0.15     | 0.42        | 33.17   | <0.0001 |
|                                          | Sugar <sup>2</sup> ·Yeast <sup>2</sup> | 1    | -0.01    | 0.15        | 11.50   | 0.0009  |
| Residuals                                |                                        | 235  |          | 0.01        |         |         |
| log<br>(TAG/Prot.)                       | (Intercept)                            |      | -1.74    |             |         |         |
|                                          | Sugar                                  | 1    | -2.70    | 108.46      | 581.81  | <0.0001 |
|                                          | Yeast                                  | 1    | 0.29     | 18.33       | 98.32   | <0.0001 |
|                                          | Sugar <sup>2</sup>                     | 1    | 1.78     | 0.07        | 0.38    | 0.5550  |
|                                          | Yeast <sup>2</sup>                     | 1    | -0.16    | 0.58        | 3.12    | 0.0760  |
|                                          | Sugar <sup>3</sup>                     | 1    | -0.27    | 2.65        | 14.24   | 0.0018  |
|                                          | Sugar·Yeast                            | 1    | -0.14    | 3.83        | 20.53   | <0.0001 |
| Sugar <sup>2</sup> ·Yeast <sup>2</sup>   | 1                                      | 0.01 | 0.84     | 4.52        | 0.0372  |         |
| Residuals                                |                                        | 233  |          | 0.19        |         |         |
| Sqrt<br>(Food/fly/6h)                    | (Intercept)                            |      | 9.74     |             |         |         |
|                                          | Sugar                                  | 1    | -0.93    | 199.12      | 352.57  | <0.0001 |
|                                          | Yeast                                  | 1    | -5.73    | 177.08      | 313.56  | <0.0001 |
|                                          | Sugar <sup>2</sup>                     | 1    | 0.20     | 0.11        | 0.20    | 0.6917  |
|                                          | Yeast <sup>2</sup>                     | 1    | 0.86     | 63.01       | 111.57  | <0.0001 |
|                                          | Sugar·Yeast                            | 1    | 0.85     | 3.12        | 5.53    | 0.0190  |
|                                          | Sugar <sup>2</sup> ·Yeast <sup>2</sup> | 1    | -0.04    | 6.85        | 12.13   | 0.0005  |
| Residuals                                |                                        | 235  |          | 0.57        |         |         |
| Sqrt<br>(cal/fly/6h)                     | (Intercept)                            |      | 0.150    |             |         |         |
|                                          | Sugar                                  | 1    | -0.017   | 0.5983      | 1344.06 | <0.0001 |
|                                          | Yeast                                  | 1    | 0.108    | 0.0015      | 3.38    | 0.0661  |
|                                          | Sugar <sup>2</sup>                     | 1    | 0.014    | 0.0166      | 37.22   | <0.0001 |
|                                          | Yeast <sup>2</sup>                     | 1    | 0.023    | 0.0523      | 117.57  | <0.0001 |
|                                          | Sugar·Yeast                            | 1    | 0.010    | 0.0056      | 12.49   | 0.0009  |
|                                          | Sugar <sup>2</sup> ·Yeast <sup>2</sup> | 1    | -0.001   | 0.0031      | 6.87    | 0.0092  |
| Residuals                                |                                        | 235  |          | 0.0005      |         |         |

Statistical analysis and best fit model for Diet Response Surface estimation (see Experimental procedures for details) presented in Figure S1A (log  $\mu\text{gTAG}/\text{fly}$ ), S1B (log  $\mu\text{gProt.}/\text{fly}$ ) S1C (logTAG/Prot) and S3A (sqrt ( $\mu\text{g Food}/\text{fly}/\text{day}$ )). Estimated regression coefficients are from a multiple regression analysis, while degrees of freedom (Df), sums of squares, and F values are obtained by ANOVA. P-values are obtained by randomization.
