# Supplementary material
Source: PubMed Central journal article supplement (PMC2574586)
Supplement: NIHMS48304-supplement-Table_S5.pdf [file NIHMS48304-supplement-Table_S5.pdf]

**Table S5. CantonS Strain Females Diet Response Surfaces Raw Data**

|                       | Yeast<br>g·dl <sup>-1</sup> | 2.5 g·dl <sup>-1</sup> Sugar |         |     | 5 g·dl <sup>-1</sup> Sugar |         |     | 10 g·dl <sup>-1</sup> Sugar |         |     | 20 g·dl <sup>-1</sup> Sugar |         |     | 40 g·dl <sup>-1</sup> Sugar |         |     |
|-----------------------|-----------------------------|------------------------------|---------|-----|----------------------------|---------|-----|-----------------------------|---------|-----|-----------------------------|---------|-----|-----------------------------|---------|-----|
|                       |                             | mean                         | s.e.    | n   | mean                       | s.e.    | n   | mean                        | s.e.    | n   | mean                        | s.e.    | n   | mean                        | s.e.    | n   |
| TAG/fly<br>(µg)       | 40                          | 30.4                         | 1.29    | 14  | 30.0                       | 1.78    | 14  | 41.6                        | 1.55    | 15  | 55.1                        | 1.98    | 16  | 71.5                        | 3.15    | 15  |
|                       | 20                          | 31.3                         | 1.47    | 15  | 31.5                       | 2.13    | 13  | 33.7                        | 2.55    | 13  | 54.5                        | 3.00    | 15  | 66.3                        | 3.47    | 15  |
|                       | 10                          | 30.9                         | 1.44    | 15  | 27.3                       | 1.96    | 15  | 43.9                        | 2.34    | 15  | 58.7                        | 2.55    | 16  | 50.6                        | 3.47    | 16  |
|                       | 5                           | 24.7                         | 1.11    | 16  | 29.0                       | 2.11    | 15  | 31.5                        | 2.28    | 15  | 46.1                        | 2.20    | 15  | 53.7                        | 2.77    | 16  |
|                       | 2.5                         | 26.0                         | 1.59    | 16  | 22.3                       | 1.16    | 16  | 27.8                        | 1.85    | 15  | 40.8                        | 3.11    | 15  | 36.3                        | 3.28    | 15  |
| Prot./fly<br>(µg)     | 40                          | 142.5                        | 5.19    | 14  | 138.9                      | 4.90    | 14  | 151.5                       | 3.69    | 15  | 166.3                       | 8.13    | 16  | 140.3                       | 2.73    | 15  |
|                       | 20                          | 131.2                        | 8.07    | 15  | 132.2                      | 7.50    | 13  | 125.8                       | 4.42    | 13  | 121.9                       | 3.52    | 15  | 106.0                       | 4.10    | 15  |
|                       | 10                          | 114.2                        | 3.50    | 15  | 100.9                      | 5.90    | 15  | 93.2                        | 4.19    | 15  | 106.1                       | 4.62    | 16  | 127.2                       | 11.15   | 16  |
|                       | 5                           | 87.5                         | 5.45    | 16  | 77.8                       | 4.45    | 15  | 64.6                        | 3.97    | 15  | 83.8                        | 4.40    | 15  | 81.6                        | 3.71    | 16  |
|                       | 2.5                         | 76.7                         | 5.21    | 16  | 77.6                       | 3.83    | 16  | 59.1                        | 4.15    | 15  | 87.3                        | 4.56    | 15  | 78.3                        | 3.60    | 15  |
| (TAG/<br>Prot.)       | 40                          | 0.22                         | 0.01    | 14  | 0.22                       | 0.01    | 14  | 0.28                        | 0.01    | 15  | 0.35                        | 0.03    | 16  | 0.51                        | 0.02    | 15  |
|                       | 20                          | 0.25                         | 0.02    | 15  | 0.24                       | 0.02    | 13  | 0.27                        | 0.02    | 13  | 0.45                        | 0.03    | 15  | 0.64                        | 0.05    | 15  |
|                       | 10                          | 0.27                         | 0.01    | 15  | 0.27                       | 0.01    | 15  | 0.48                        | 0.03    | 15  | 0.57                        | 0.04    | 16  | 0.46                        | 0.06    | 16  |
|                       | 5                           | 0.30                         | 0.02    | 16  | 0.38                       | 0.02    | 15  | 0.49                        | 0.03    | 15  | 0.58                        | 0.05    | 15  | 0.68                        | 0.04    | 16  |
|                       | 2.5                         | 0.35                         | 0.02    | 16  | 0.30                       | 0.02    | 16  | 0.49                        | 0.04    | 15  | 0.49                        | 0.05    | 15  | 0.49                        | 0.06    | 15  |
| Lifespan<br>(days)    | 40                          | 54.0                         | 1.67    | 74  | 56.3                       | 1.16    | 121 | 53.1                        | 1.23    | 125 | 52.1                        | 1.02    | 124 | 38.5                        | 0.92    | 125 |
|                       | 20                          | 64.1                         | 0.84    | 120 | 64.2                       | 1.02    | 125 | 62.2                        | 1.15    | 124 | 62.2                        | 0.88    | 123 | 51.2                        | 1.29    | 123 |
|                       | 10                          | 64.6                         | 1.17    | 127 | 67.6                       | 1.00    | 124 | 67.0                        | 1.39    | 120 | 65.9                        | 1.00    | 117 | 59.2                        | 1.19    | 124 |
|                       | 5                           | 68.5                         | 1.13    | 111 | 69.4                       | 0.89    | 117 | 68.5                        | 1.31    | 113 | 63.1                        | 1.40    | 117 | 58.8                        | 1.09    | 121 |
|                       | 2.5                         | 63.4                         | 1.59    | 113 | 55.6                       | 1.53    | 117 | 55.5                        | 1.38    | 128 | 40.8                        | 0.87    | 122 | 36.5                        | 0.58    | 122 |
| Food/fly<br>/6hr (µg) | 40                          | 14.8                         | 5.9     | 7   | 7.9                        | 5.2     | 9   | 5.4                         | 1.9     | 8   | 27.5                        | 3.4     | 8   | 33.8                        | 8.1     | 7   |
|                       | 20                          | 22.4                         | 4.8     | 8   | 2.7                        | 3.4     | 10  | 12.1                        | 2.9     | 9   | 43.3                        | 4.7     | 9   | 25.2                        | 2.8     | 8   |
|                       | 10                          | 13.1                         | 2.5     | 9   | 3.1                        | 2.3     | 9   | 8.3                         | 1.8     | 9   | 25.7                        | 2.4     | 9   | 23.6                        | 3.1     | 9   |
|                       | 5                           | 45.7                         | 4.2     | 7   | 38.2                       | 3.7     | 9   | 48.5                        | 3.6     | 9   | 40.5                        | 4.3     | 7   | 52.1                        | 2.8     | 9   |
|                       | 2.5                         | 121.4                        | 5.6     | 10  | 86.2                       | 7.3     | 8   | 87.8                        | 2.4     | 9   | 61.2                        | 4.2     | 7   | 59.2                        | 4.4     | 7   |
| calories<br>/fly/6hr  | 40                          | 1.8E-02                      | 7.0E-03 | 7   | 9.9E-03                    | 6.4E-03 | 9   | 7.3E-03                     | 2.5E-03 | 8   | 4.1E-02                     | 5.2E-03 | 8   | 6.0E-02                     | 1.4E-02 | 7   |
|                       | 20                          | 1.7E-02                      | 3.5E-03 | 8   | 2.2E-03                    | 2.7E-03 | 10  | 1.1E-02                     | 2.7E-03 | 9   | 5.0E-02                     | 5.4E-03 | 9   | 3.8E-02                     | 4.2E-03 | 8   |
|                       | 10                          | 5.8E-03                      | 1.1E-03 | 9   | 1.6E-03                    | 1.2E-03 | 9   | 5.6E-03                     | 1.2E-03 | 9   | 2.4E-02                     | 2.2E-03 | 9   | 3.1E-02                     | 4.2E-03 | 9   |
|                       | 5                           | 1.3E-02                      | 1.2E-03 | 7   | 1.4E-02                    | 1.3E-03 | 9   | 2.5E-02                     | 1.9E-03 | 9   | 3.2E-02                     | 3.4E-03 | 7   | 6.5E-02                     | 3.5E-03 | 9   |
|                       | 2.5                         | 2.3E-02                      | 1.1E-03 | 10  | 2.4E-02                    | 2.0E-03 | 8   | 3.9E-02                     | 1.1E-03 | 9   | 4.5E-02                     | 3.1E-03 | 7   | 7.1E-02                     | 5.2E-03 | 7   |

Summary of mean and standard error values obtained during 25 nutritional treatments of adult female, CantonS strain flies. Triglycerides (TAG) per fly, protein (Prot.) per fly, scaled triglycerides (TAG/Prot.), and food consumption data are representative of at least 2 independent trials. n represents the number of replicates per treatment, each replicate containing 5 flies.
