# Supplementary material
Source: PubMed Central journal article supplement (PMC2574586)
Supplement: NIHMS48304-supplement-Table_S6.pdf [file NIHMS48304-supplement-Table_S6.pdf]

**Table S7. w<sup>1118</sup> Strain Females Diet Response Surfaces Raw Data**

|                        | Yeast<br>g·dl <sup>-1</sup> | 2.5 g·dl <sup>-1</sup> Sugar |         |   | 5 g·dl <sup>-1</sup> Sugar |         |   | 10 g·dl <sup>-1</sup> Sugar |         |   | 20 g·dl <sup>-1</sup> Sugar |         |   | 40 g·dl <sup>-1</sup> Sugar |         |   |
|------------------------|-----------------------------|------------------------------|---------|---|----------------------------|---------|---|-----------------------------|---------|---|-----------------------------|---------|---|-----------------------------|---------|---|
|                        |                             | mean                         | s.e.    | n | mean                       | s.e.    | n | mean                        | s.e.    | n | mean                        | s.e.    | n | mean                        | s.e.    | n |
| TAG/fly<br>(µg)        | 40                          | 38.2                         | 4.09    | 5 | 30.5                       | 5.21    | 4 | 44.8                        | 1.25    | 5 | 41.8                        | 2.51    | 5 | 54.6                        | 1.78    | 6 |
|                        | 20                          | 42.8                         | 2.31    | 6 | 43.1                       | 4.22    | 5 | 48.9                        | 6.30    | 5 | 44.2                        | 2.34    | 6 | 58.9                        | 2.01    | 5 |
|                        | 10                          | 34.2                         | 4.97    | 6 | 51.5                       | 3.60    | 6 | 55.8                        | 3.97    | 5 | 56.5                        | 3.18    | 7 | 66.0                        | 5.64    | 5 |
|                        | 5                           | 44.7                         | 1.52    | 6 | 43.8                       | 2.24    | 5 | 52.5                        | 1.78    | 6 | 50.7                        | 1.63    | 7 | 47.3                        | 3.34    | 6 |
|                        | 2.5                         | 42.4                         | 1.95    | 6 | 53.1                       | 5.22    | 6 | 47.4                        | 3.11    | 5 | 54.0                        | 1.73    | 6 | 44.3                        | 4.65    | 6 |
| Prot./fly<br>(µg)      | 40                          | 95.1                         | 3.57    | 5 | 70.5                       | 21.33   | 4 | 94.6                        | 1.40    | 5 | 88.9                        | 3.79    | 5 | 87.8                        | 1.25    | 6 |
|                        | 20                          | 85.2                         | 2.26    | 6 | 75.5                       | 11.34   | 5 | 91.1                        | 6.10    | 5 | 85.9                        | 3.85    | 6 | 80.6                        | 5.29    | 5 |
|                        | 10                          | 59.4                         | 10.63   | 6 | 59.1                       | 11.45   | 6 | 65.5                        | 6.68    | 5 | 58.9                        | 3.86    | 7 | 60.3                        | 14.52   | 5 |
|                        | 5                           | 48.5                         | 6.87    | 6 | 70.4                       | 7.30    | 5 | 75.5                        | 4.98    | 6 | 54.5                        | 5.05    | 7 | 55.2                        | 3.23    | 6 |
|                        | 2.5                         | 52.6                         | 6.56    | 6 | 64.1                       | 11.43   | 6 | 58.8                        | 7.47    | 5 | 58.0                        | 4.78    | 6 | 26.0                        | 4.20    | 6 |
| (TAG/<br>Prot.)        | 40                          | 0.40                         | 0.04    | 5 | 0.90                       | 0.52    | 4 | 0.47                        | 0.02    | 5 | 0.47                        | 0.04    | 5 | 0.62                        | 0.02    | 6 |
|                        | 20                          | 0.50                         | 0.02    | 6 | 0.60                       | 0.06    | 5 | 0.53                        | 0.04    | 5 | 0.52                        | 0.02    | 6 | 0.74                        | 0.06    | 5 |
|                        | 10                          | 0.62                         | 0.06    | 6 | 1.11                       | 0.31    | 6 | 0.87                        | 0.05    | 5 | 0.97                        | 0.06    | 7 | 2.43                        | 1.46    | 5 |
|                        | 5                           | 1.03                         | 0.16    | 6 | 0.65                       | 0.07    | 5 | 0.71                        | 0.06    | 6 | 0.96                        | 0.07    | 7 | 0.86                        | 0.04    | 6 |
|                        | 2.5                         | 0.89                         | 0.16    | 6 | 1.18                       | 0.43    | 6 | 0.87                        | 0.14    | 5 | 0.97                        | 0.09    | 6 | 1.81                        | 0.16    | 6 |
| Food/fly<br>/6 hr (µg) | 40                          | 3.4                          | 0.9     | 5 | 4.3                        | 2.4     | 4 | 0.7                         | 1.1     | 5 | 4.1                         | 1.8     | 5 | 1.0                         | 1.5     | 6 |
|                        | 20                          | 5.4                          | 3.3     | 6 | 4.9                        | 1.9     | 5 | 8.9                         | 1.4     | 5 | 4.7                         | 1.5     | 6 | 21.1                        | 6.5     | 5 |
|                        | 10                          | 10.3                         | 3.5     | 6 | 0.3                        | 0.8     | 6 | 13.4                        | 2.5     | 5 | 14.1                        | 2.0     | 7 | 22.9                        | 8.5     | 5 |
|                        | 5                           | 41.3                         | 2.9     | 6 | 33.5                       | 2.3     | 5 | 26.8                        | 3.3     | 6 | 25.5                        | 2.3     | 7 | 27.4                        | 3.2     | 6 |
|                        | 2.5                         | 88.1                         | 5.9     | 6 | 39.2                       | 10.5    | 6 | 43.4                        | 1.5     | 5 | 40.7                        | 1.6     | 6 | 36.6                        | 2.7     | 6 |
| calories/<br>fly/6hr   | 40                          | 4.0E-03                      | 1.1E-03 | 5 | 5.4E-03                    | 3.0E-03 | 4 | 9.0E-04                     | 1.4E-03 | 5 | 6.2E-03                     | 2.8E-03 | 5 | 1.9E-03                     | 2.6E-03 | 6 |
|                        | 20                          | 4.0E-03                      | 2.4E-03 | 6 | 3.9E-03                    | 1.5E-03 | 5 | 8.2E-03                     | 1.3E-03 | 5 | 5.4E-03                     | 1.7E-03 | 6 | 3.2E-02                     | 9.8E-03 | 5 |
|                        | 10                          | 4.6E-03                      | 1.6E-03 | 6 | 1.5E-04                    | 4.1E-04 | 6 | 8.9E-03                     | 1.7E-03 | 5 | 1.3E-02                     | 1.9E-03 | 7 | 3.1E-02                     | 1.1E-02 | 5 |
|                        | 5                           | 1.2E-02                      | 8.1E-04 | 6 | 1.2E-02                    | 8.5E-04 | 5 | 1.4E-02                     | 1.7E-03 | 6 | 2.0E-02                     | 1.9E-03 | 7 | 3.4E-02                     | 4.0E-03 | 6 |
|                        | 2.5                         | 1.7E-02                      | 1.1E-03 | 6 | 1.1E-02                    | 2.9E-03 | 6 | 1.9E-02                     | 6.7E-04 | 5 | 3.0E-02                     | 1.2E-03 | 6 | 4.4E-02                     | 3.2E-03 | 6 |

Summary of mean and standard error (s.e.) values obtained during 25 nutritional treatments of adult female, w<sup>1118</sup> strain flies. Triglycerides (TAG) per fly, protein (Prot.) per fly, scaled triglycerides (TAG/Prot.), and food consumption data are representative of at least 2 independent trials. n represents the number of replicates per treatment, each replicate containing 5 flies.
