# Supplementary material
Source: PubMed Central journal article supplement (PMC2574586)
Supplement: NIHMS48304-supplement-Table_S8.pdf [file NIHMS48304-supplement-Table_S8.pdf]

Table S8. w<sup>1118</sup> Strain Females Diet Response Surfaces ANOVA & Regression Analysis

| Response                                            | Coefficient                            | Df  | Estimate | Sum of Squares | F      | P       |
|-----------------------------------------------------|----------------------------------------|-----|----------|----------------|--------|---------|
| log<br>( $\mu\text{gTAG}/\text{fly}$ )              | (Intercept)                            |     | 3.73     |                |        |         |
|                                                     | Sugar                                  | 1   | -0.02    | 1.35           | 30.44  | <0.0001 |
|                                                     | Yeast                                  | 1   | 0.10     | 0.22           | 5.00   | 0.0250  |
|                                                     | Yeast <sup>2</sup>                     | 1   | -0.06    | 0.27           | 6.08   | 0.0133  |
|                                                     | Sugar·Yeast                            | 1   | 0.05151  | 0.35           | 7.8084 | 0.0078  |
| Residuals                                           |                                        | 135 |          | 0.0443         |        |         |
| log<br>( $\mu\text{gProt.}/\text{fly}$ )            | (Intercept)                            |     | 3.26     |                |        |         |
|                                                     | Sugar                                  | 1   | 0.45     | 0.13           | 0.67   | 0.4220  |
|                                                     | Yeast                                  | 1   | 0.22     | 6.20           | 30.83  | <0.0001 |
|                                                     | Sugar <sup>2</sup>                     | 1   | -0.11    | 0.96           | 4.79   | 0.0281  |
| Residuals                                           |                                        | 136 |          | 0.2012         |        |         |
| log<br>(TAG/Prot.)                                  | (Intercept)                            |     | -0.02    |                |        |         |
|                                                     | Sugar                                  | 1   | 0.13     | 2.33           | 15.54  | <0.0001 |
|                                                     | Yeast                                  | 1   | -0.26    | 8.70           | 58.00  | <0.0001 |
| Residuals                                           |                                        | 137 |          | 0.1501         |        |         |
| sqrt<br>( $\mu\text{g food}/\text{fly}/6\text{h}$ ) | (Intercept)                            |     | 19.71    |                |        |         |
|                                                     | Sugar                                  | 1   | -6.59    | 0.85           | 0.99   | 0.3604  |
|                                                     | Yeast                                  | 1   | -8.09    | 445.74         | 518.57 | <0.0001 |
|                                                     | Sugar <sup>2</sup>                     | 1   | 0.87     | 16.08          | 18.71  | 0.0002  |
|                                                     | Yeast <sup>2</sup>                     | 1   | 0.79     | 7.19           | 8.36   | 0.0054  |
|                                                     | Sugar·Yeast                            | 1   | 2.02     | 29.09          | 33.85  | <0.0001 |
|                                                     | Sugar <sup>2</sup> ·Yeast <sup>2</sup> | 1   | -0.07    | 16.98          | 19.75  | <0.0001 |
| Residuals                                           |                                        | 121 |          | 0.86           |        |         |
| sqrt<br>(calories/fly/6h)                           | (Intercept)                            |     | 0.266    |                |        |         |
|                                                     | Sugar                                  | 1   | -0.103   | 0.0954         | 123.71 | <0.0001 |
|                                                     | Yeast                                  | 1   | -0.094   | 0.1123         | 145.53 | <0.0001 |
|                                                     | Sugar <sup>2</sup>                     | 1   | 0.025    | 0.0243         | 31.50  | <0.0001 |
|                                                     | Yeast <sup>2</sup>                     | 1   | 0.011    | 0.0003         | 0.43   | 0.5173  |
|                                                     | Sugar·Yeast                            | 1   | 0.023    | 0.0040         | 5.24   | 0.0227  |
|                                                     | Sugar <sup>2</sup> ·Yeast <sup>2</sup> | 1   | -0.001   | 0.0062         | 8.07   | 0.0061  |
| Residuals                                           |                                        | 121 |          | 0.0008         |        |         |

Statistical analysis and best fit model for Diet Response Surface estimation (see Experimental procedures for details) presented in Figure S2A (log  $\mu\text{gTAG}/\text{fly}$ ), S2B (log  $\mu\text{gProt.}/\text{fly}$ ), S2C (log TAG/Prot), S2D (Sqrt (Food/fly/day)), and S2E (Sqrt (calories/fly/day)). Estimated regression coefficients are from a multiple regression analysis, while degrees of freedom (Df), sums of squares, and F values are obtained by ANOVA. P values are obtained by randomization.
